# Supplementary material for: A nuclear DNA barcode for eastern North American oaks and application to a study of hybridization in an Arboretum setting
Source: PubMed Central journal article supplement (PMC6010771; doi:10.1002/ece3.4122), 2018-05-08
Supplement: ECE3-8-5837-s001.pdf [file ECE3-8-5837-s001.pdf]

## Supporting Information

### Supplementary files

**Supplementary file 1.** SNP evaluation. Accession and species identification of samples used to evaluate potential SNPs. Samples that were also used for SNP identification and served as learning samples during barcode evaluation are indicated with 'x'. Samples not coinciding with SNP identification and learning samples are indicated with '- -'.

**Supplementary file 2.** Custom script to select for species-specific SNP per locus sequence (PyRAD/RADami approach).

**Supplementary file 3.** Custom script to select for species-specific SNPs per locus sequence (STACKS approach).

**Supplementary file 4.** Barcode selection. Out of 291 screened SNPs at least 119 SNPs are considered for barcode genotyping tool kit. Maximum likelihood (Phylogeny.fr) was used to verify SNP selection.

**Supplementary file 5.** List of 70 SNP-multiplex. Selected SNPs for 2-plex with SNP\_ID corresponding species and RAD-seq with implemented polymorphism. SNP\_IDs in bold = 1<sup>st</sup> barcode multiplex. The remaining SNPs\_IDs belong to 2<sup>nd</sup> multiplex of the barcode. Table is sorted alphabetically by species.

Clade 1 = *Q. sinuata*, *Q. oglethorpensis*, *Q. boyntonii*, *Q. stellata*, *Q. chapmanii*, *Q. austrina*.

Asian white oaks = *Q. aliena*, *Q. fabri*. European white oaks = *Q. faginea*, *Q. petraea*, *Q. robur*.

Supplementary file 1. SNP evaluation.

| Species                                                | Accession id | SNP identification | Learning sample<br>(barcode evaluation) |
|--------------------------------------------------------|--------------|--------------------|-----------------------------------------|
| <i>Quercus alba</i>                                    | OAK-MOR-130  | --                 | x                                       |
| <i>Quercus alba</i>                                    | OAK-MOR-613  | --                 | x                                       |
| <i>Quercus alba</i>                                    | OAK-MOR-204  | x                  | x                                       |
| <i>Quercus alba</i>                                    | OAK-MOR-359  | x                  | x                                       |
| <i>Quercus alba</i>                                    | OAK-MOR-76   | x                  | x                                       |
| <i>Quercus alba</i>                                    | PM-19        | x                  | x                                       |
| <i>Quercus aliena</i>                                  | OAK-MOR-698  | --                 | x                                       |
| <i>Quercus austrina</i>                                | OAK-MOR-530  | --                 | --                                      |
| <i>Quercus austrina</i>                                | OAK-MOR-511  | x                  | --                                      |
| <i>Quercus bicolor</i>                                 | OAK-MOR-246  | --                 | x                                       |
| <i>Quercus bicolor</i>                                 | OAK-MOR-289  | x                  | x                                       |
| <i>Quercus bicolor</i>                                 | OAK-MOR-342  | x                  | x                                       |
| <i>Quercus boyntonii</i>                               | OAK-MOR-181  | --                 | --                                      |
| <i>Quercus boyntonii</i>                               | OAK-MOR-427  | --                 | --                                      |
| <i>Quercus boyntonii</i>                               | OAK-MOR-436  | x                  | --                                      |
| <i>Quercus boyntonii</i>                               | OAK-MOR-544  | x                  | --                                      |
| <i>Quercus brandegeei</i>                              | OAK-MOR-147  | --                 | --                                      |
| <i>Quercus chapmanii</i>                               | OAK-MOR-220  | --                 | --                                      |
| <i>Quercus chapmanii</i>                               | OAK-MOR-444  | x                  | --                                      |
| <i>Quercus fabri</i>                                   | OAK-MOR-545  | --                 | x                                       |
| <i>Quercus faginea</i>                                 | OAK-MOR-215  | --                 | --                                      |
| <i>Quercus faginea</i>                                 | OAK-MOR-216  | --                 | --                                      |
| <i>Quercus faginea</i>                                 | OAK-MOR-456  | --                 | --                                      |
| <i>Quercus faginea</i>                                 | OAK-MOR-658  | --                 | --                                      |
| <i>Quercus faginea broteroi</i>                        | OAK-MOR-278  | --                 | --                                      |
| <i>Quercus fusiformis</i>                              | OAK-MOR-200  | --                 | --                                      |
| <i>Quercus fusiformis</i>                              | OAK-MOR-218  | --                 | --                                      |
| <i>Quercus fusiformis</i>                              | OAK-MOR-307  | --                 | --                                      |
| <i>Quercus fusiformis</i>                              | OAK-MOR-654  | --                 | --                                      |
| <i>Quercus fusiformis</i> (x <i>Q. virg.</i> ?)        | OAK-MOR-312  | --                 | --                                      |
| <i>Quercus gambelii</i>                                | OAK-MOR-132  | --                 | x                                       |
| <i>Quercus gambelii</i>                                | OAK-MOR-198  | --                 | --                                      |
| <i>Quercus gambelii</i>                                | OAK-MOR-630  | --                 | x                                       |
| <i>Quercus gambelii</i>                                | OAK-MOR-635  | --                 | x                                       |
| <i>Quercus lyrata</i>                                  | OAK-MOR-385  | x                  | x                                       |
| <i>Quercus lyrata</i>                                  | OAK-MOR-611  | x                  | x                                       |
| <i>Quercus</i> ( <i>macrocarpa</i> x <i>gambelii</i> ) | OAK-MOR-300  | --                 | x                                       |

|                                                  |             |    |    |
|--------------------------------------------------|-------------|----|----|
| <i>Quercus macrocarpa</i>                        | OAK-MOR-616 | -- | -- |
| <i>Quercus macrocarpa</i>                        | OAK-MOR-283 | -- | x  |
| <i>Quercus macrocarpa</i>                        | OAK-MOR-357 | x  | x  |
| <i>Quercus macrocarpa</i>                        | OAK-MOR-615 | x  | x  |
| <i>Quercus macrocarpa</i>                        | OAK-MOR-671 | x  | x  |
| <i>Quercus macrocarpa</i>                        | OAK-MOR-279 | -- | x  |
| <i>Quercus macrocarpa</i>                        | OAK-MOR-290 | -- | x  |
| <i>Quercus macrocarpa</i>                        | OAK-MOR-249 | x  | x  |
| <i>Quercus macrocarpa</i>                        | OAK-MOR-487 | x  | x  |
| <i>Quercus macrocarpa</i>                        | OAK-MOR-614 | x  | x  |
| <i>Quercus macrocarpa</i>                        | OAK-MOR-672 | x  | x  |
| <i>Quercus macrocarpa</i>                        | OAK-MOR-673 | x  | x  |
| <i>Quercus margarettae</i>                       | OAK-MOR-644 | -- | -- |
| <i>Quercus margarettae</i>                       | OAK-MOR-223 | -- | -- |
| <i>Quercus margarettae</i>                       | OAK-MOR-221 | -- | -- |
| <i>Quercus michauxii</i>                         | OAK-MOR-353 | x  | x  |
| <i>Quercus michauxii</i>                         | PM155       | x  | x  |
| <i>Quercus michauxii</i>                         | OAK-MOR-694 | x  | x  |
| <i>Quercus michauxii</i>                         | OAK-MOR-700 | x  | x  |
| <i>Quercus michauxii</i>                         | PM143       | x  | x  |
| <i>Quercus minima</i>                            | OAK-MOR-177 | -- | -- |
| <i>Quercus montana</i>                           | OAK-MOR-352 | x  | x  |
| <i>Quercus montana</i>                           | PM-76       | -- | x  |
| <i>Quercus montana</i>                           | OAK-MOR-576 | -- | x  |
| <i>Quercus montana</i>                           | OAK-MOR-575 | x  | x  |
| <i>Quercus montana</i>                           | OAK-MOR-693 | x  | x  |
| <i>Quercus muehlenbergii</i>                     | OAK-MOR-007 | -- | x  |
| <i>Quercus muehlenbergii</i>                     | OAK-MOR-383 | x  | x  |
| <i>Quercus muehlenbergii</i>                     | OAK-MOR-639 | x  | x  |
| <i>Quercus muehlenbergii</i>                     | OAK-MOR-632 | x  | x  |
| <i>Quercus muehlenbergii</i>                     | OAK-MOR-260 | -- | x  |
| <i>Quercus muehlenbergii</i> var. <i>brayi</i>   | OAK-MOR-164 | -- | -- |
| <i>Quercus oglethorpensis</i>                    | OAK-MOR-548 | x  | -- |
| <i>Quercus oglethorpensis</i>                    | OAK-MOR-549 | x  | -- |
| <i>Quercus petraea</i>                           | OAK-MOR-072 | -- | x  |
| <i>Quercus petraea</i>                           | OAK-MOR-229 | -- | x  |
| <i>Quercus petraea</i>                           | OAK-MOR-263 | -- | x  |
| <i>Quercus petraea</i> subsp. <i>pinnatiloba</i> | OAK-MOR-227 | -- | -- |
| <i>Quercus prinoides</i>                         | OAK-MOR-143 | -- | x  |
| <i>Quercus prinoides</i>                         | OAK-MOR-157 | -- | x  |

|                                |             |    |    |
|--------------------------------|-------------|----|----|
| Quercus prinoides              | OAK-MOR-532 | x  | x  |
| Quercus prinoides              | PM-93b      | x  | x  |
| Quercus prinoides              | OAK-MOR-005 | -- | x  |
| Quercus robur                  | OAK-MOR-692 | -- | -- |
| Quercus robur                  | OAK-MOR-082 | -- | x  |
| Quercus robur                  | OAK-MOR-190 | -- | -- |
| Quercus robur                  | OAK-MOR-122 | -- | x  |
| Quercus sinuata                | OAK-MOR-418 | x  | -- |
| Quercus sinuata                | OAK-MOR-448 | x  | -- |
| Quercus sinuata var. breviloba | OAK-MOR-185 | -- | -- |
| Quercus sinuata var. breviloba | OAK-MOR-236 | -- | -- |
| Quercus sinuata var. sinuata   | OAK-MOR-187 | -- | -- |
| Quercus stellata               | OAK-MOR-074 | -- | x  |
| Quercus stellata               | OAK-MOR-340 | x  | x  |
| Quercus stellata               | PM11        | x  | x  |
| Quercus stellata               | PM145       | x  | x  |
| Quercus stellata               | OAK-MOR-194 | -- | x  |
| Quercus stellata               | OAK-MOR-251 | -- | x  |

Supplementary file 2. Custom bash script for SNP detection after PyRAD/RADami analysis.

```
#!/bin/bash
# TL-13/01/15
# Create files per sites and per locus
while read line; do
    echo "$line" > tmp
    a=$(awk '{print $1}' tmp)
    b=$(awk '{print $2}' tmp)
    IFS=', ' read -a array <<< "$b"
    for element in "${array[@]}"; do cat
        while read line; do
            echo "$line" > tmp2
            if [[ "$line" == ">"* ]]; then
                d=$(echo $line)
            elif [[ "$line" != ">"* ]]; then
                then
                    c=$(cut -c "$element" tmp2)
                    echo "$d $c" >> $a.$element.output
                else
                    continue
                fi
            done < $a
        done
    done < liste
```

### Supplementary file 3. Custom bash script for SNP detection after STACKS analysis.

```
#!/bin/bash
while read line;
do echo "$line" > tmp
a=$(awk '{print $3}' tmp)
grep "$a " sampleid.txt > tmp2
awk '{print $2}' tmp2 > tmp3
while read line;
do c=$(awk '{print $1}' tmp)
d=$(awk '{print $2}' tmp)
e=$(awk '{print $4}' tmp)
f=$(awk '{print $5}' tmp)
echo "$c $line $b $e $f"
done < tmp3
done < batch_11_p10r75sumstats_select.txt
```

### Supplementary file 4. Barcode selection using phylogenetic approach via phylogeny.fr

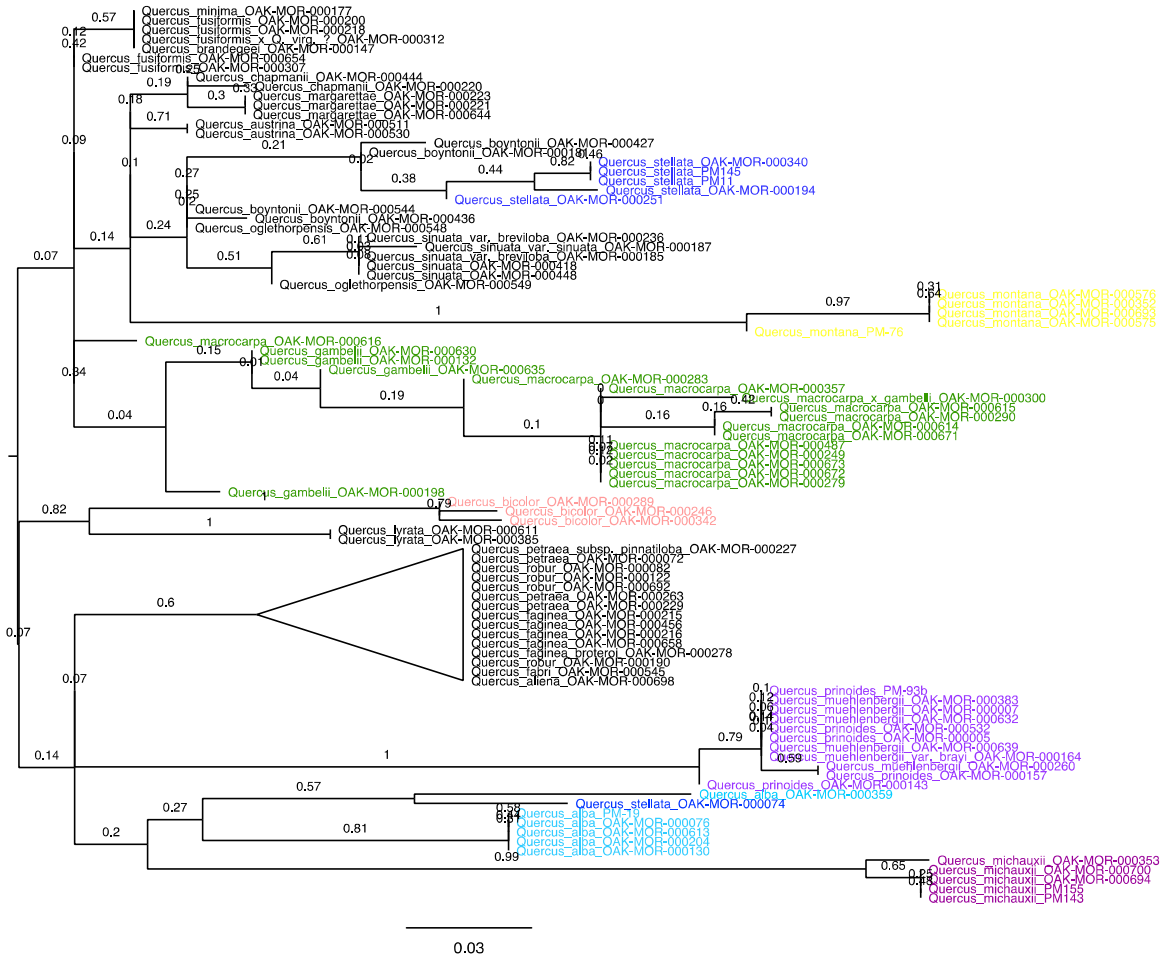

## Supplementary file 5. List of 80 SNP-multiplex

| Species            | SNP_ID         | Primer sequence                                                                                |
|--------------------|----------------|------------------------------------------------------------------------------------------------|
| <i>Q. alba</i>     | locus_10977_45 | CATTGCCAAAAGGAGGTGCAGCAAAAATGACATCTCGAAGTGG[A/G]GCTCAGCAAAACAGCTT<br>TTTCCTGTATCTTCGAATTGC     |
| <i>Q. alba</i>     | locus_5882_32  | TGGCATCACTTGAACCCAAAAATGGATTATG[A/G]TAATAGAAATTTTCTTCCAATTTTATCCTTT<br>TAAAAAGCATCATTTTTT      |
| <i>Q. alba</i>     | locus_821_26   | ATGTTACTTGTGCCAACCCACATC[T/C]AACAATTCCATCAACTCAAATTCAGTTAAAGATAATGC<br>ATCCTGAAAGCAAACAAC      |
| <i>Q. alba</i>     | CL_54979_37    | TTAAGCCAGTCCCATCATTCAAGGCCGATGT[G/T]TATGCACTTGGGGTGATTCTAATGGAATTGTT<br>AACCAGGAGAAGTGCGGGTGAC |
| <i>Q. alba</i>     | CL_35240_32    | GAATATGCGGATGTTGTGTTTCCAAG[C/T]TACTTCTCACCATTCTGCATAATTTCTACTGCTACTG<br>GAATCCTCTTCATTCTGATAT  |
| <i>Q. austrina</i> | locus_11631_48 | CAAGCTTTTAACCCAAGGATGCCCCAGTCTGTGGGTCAA[T/C]CTTCAAGCCCTATTCCACCATCTT<br>CGCACCCCTCGCGGACCCA    |
| <i>Q. austrina</i> | locus_20180_49 | CTAGAGAATATCTTTTGATTTTTAGTTTAGAAGGGAAGCTAARGATTT[G/A]AAGGATGGCGGCTA<br>CCCTATGAATACTTTCAAGAAG  |
| <i>Q. austrina</i> | locus_295_56   | CAAATTAACAAAAGGGTATAAAAAGAC--<br>AGTTTTCAGTGTCTCTCTCTATTGACA[T/C]TCAATAGCACATTCTTGGCAGAGCTTAGA |
| <i>Q. austrina</i> | locus_3169_44  | TAGAAGGCATAGCTTGCCTATTAAATCATCGATTTGATGTAT[A/G]AAGGGGTAAACAAAATG<br>AAAGATTTTATGCATACCTTGT     |
| <i>Q. austrina</i> | locus_5422_58  | ATGGGATCCTTTTGGGAGGCATTCTGGTCATGTATGAGTTCATAATTTTCTGAGAC[C/A]TATTCT<br>TCTCCTTTTGTACTTTTTT     |
| <i>Q. bicolor</i>  | locus_1378_30  | ACTTTGATATGATGATCCAGATAGAATGC[A/G]GTAGAACAAGTTAATATTTTCAGAACCGCATCT<br>GGAATCATCTCACCATTTACAA  |

|                      |                |                                                                                                |
|----------------------|----------------|------------------------------------------------------------------------------------------------|
| <i>Q. bicolor</i>    | locus_24383_42 | AGAAAGCAGAAAATGAATAGTTAAAGCTGAAGTCAGGGTGA[T/A]GCCCTTTTTGTTAAATTATT<br>GGATAATTGGAAGATTGGTTTC   |
| <i>Q. bicolor</i>    | locus_26761_43 | CGTAATTTTGAAGTT-ACAACACATCATGGCCTGCATTGGAC[A/G]CAATCATCTG--<br>GTTGCTCAAATTTGGTCCAGTATA-AT     |
| <i>Q. bicolor</i>    | locus_461_36   | GTTTATCATTCCCCATCTGGCCACAATTAATAGA[T/C]GGAGTTATTCAAATGTTTAACTATTCTT<br>CATACTAGACAAACAAGAC     |
| <i>Q. bicolor</i>    | locus_4850_29  | CAATGTTGGCAAAGTATTCTGATCCATT[G/A]GTATATACAGGACCTATACGGGTGAGAACAGGCC<br>ATGAGATCTTGCCTATTCTTC   |
| <i>Q. chapmanii</i>  | locus_2684_26  | AATCGCAGATGGGCTTGGCGGCTTT[C/G]AATGACGGTGTCCAATTTGGCCCAAGTTATTTGGGTC<br>ATCTTATTCA-CCGGATTTAGG  |
| <i>Q. lyrata</i>     | locus_3962_56  | AGCCTTGGAGGATCTTGATTCCCTTACTTCTAAATGCTTCAAGAAATGATCCAGGA[G/A]CCTCAGTT<br>GAATCAATGAAAGGAAAGATC |
| <i>Q. lyrata</i>     | locus_8059_35  | GAAAGGAGTTCCATTAGGCATGTCTTTCCCCTGT[T/C]GCCTCTTCTCCCTATCCCTAGCACCTGCT<br>GAAGACATGCAGCAACCATA   |
| <i>Q. lyrata</i>     | locus_9121_49  | AAGCCAATTTTATAGCATAAAGATAACTGAGGACAGAATCAAACCA[C/T]TT-<br>CAAGTAAGATGACATATTATAAGAGATATAA      |
| <i>Q. lyrata</i>     | locus_8617_30  | TTATCAACCCAAGAACAACAATCCTTGAA[G/T]AGG-AAAAAATAG-<br>TTTTACTTTTATTTAATCGCTAATTCAATAATGAAACCTGCA |
| <i>Q. macrocarpa</i> | CL_49943_41    | GCTTTTGTGGTTCAACATACATTTGTGTACCTTT[A/T]TTGTTTTGAATTAAGTAGTNTTTGACAT<br>GGACAGGATTACAGCCTTTAG   |
| <i>Q. macrocarpa</i> | locus_11302_50 | AATTACCACAAATTTGAAGATATAAGGTCCCTTCTCTTTAACTATTTTC[C/T]GCCCATGGGTCTCA<br>TACACCCTCTTCGGATCTTTA  |
| <i>Q. macrocarpa</i> | locus_3999_44  | TAGTTTTTCTGCATAATGTTTTGTTCTATAACCTTTATAAA[C/T]CCGTGTGTTGTGATTAATATA<br>TGAGATATATTAATTGTTCC    |
| <i>Q. macrocarpa</i> | newl_25158_45  | CACCAGTCTTTCCTCTTGTTGTTGGGGTTTCAGTGGTTGCCTTG[G/T]TTATCAGTATGCCAAGGTAA<br>TTGTAATATTATTTCCCTA   |

|                     |                |                                                                                                |
|---------------------|----------------|------------------------------------------------------------------------------------------------|
| <i>Q. michauxii</i> | locus_10809_46 | GTCGGGTCCGGGCATAAAGAAACCCGACCCATTGCCATTCTAAG[T/C]CTAGGAATCAACTACTC<br>CAACAAACAATTGGGGGTAA     |
| <i>Q. michauxii</i> | locus_13856_44 | AACTTTTCAAGATGGTTTGTGAACATAATGAAACCGACCTAGA[T/C]ATAAAAATACCTACAGTAA<br>TGCTCCACAAGATGCTGGT     |
| <i>Q. michauxii</i> | locus_17927_52 | CATAAAGTCTTTGCGAAGAATATGCCGCACACCATGCAATGCAGATGCTAC[A/G]GCATATGCATA<br>CCTTAATTTGACAAAGAAATG   |
| <i>Q. michauxii</i> | locus_28072_46 | TAAAATTTTCTGCATATTTATGTTTTAATCGTCGTTTACGATGTG[G/A]ATATGTTTAGAGATTCGTG<br>GCATTTGTTTTAAATGGGAC  |
| <i>Q. michauxii</i> | locus_31722_39 | GAACACCATCTTCTTCAGGTAC-<br>AAAATTTGAGTCCAA[C/A]TTACATTAGTTCCATACTGGAATAAAAATTGGTCCATTCTCATAATA |
| <i>Q. michauxii</i> | locus_7123_50  | CAGAAAGTACATAAGACTTGTTAAATGTAATAAACTACAAAGTCAAAG[C/G]TTGCCCAAGAAT<br>GCATGTTGCAAGAAAGAATACC    |
| <i>Q. michauxii</i> | locus_7834_43  | CACATGGACAATTTTAAGGCCCAATGCATCAAGCTGAGCACG[G/A]AACTGAGAAAGATCAGTTG<br>GCTTTCCTTGCTTTTTGACC     |
| <i>Q. michauxii</i> | locus_8226_51  | TTGTACATTGCCTTGTTTCAGGTTGTTGATAAACCGTTTGAAAGTC--<br>GT[C/A]TTTATTGACTTCTCGACACCTATCAT-AAAATCAT |
| <i>Q. montana</i>   | locus_2085_53  | ATCTAAGTCAAGAACTCAAAGCTATGATTATGACATCCATCTTCCCCTGT[C/T]TACTTAACATG<br>CAGCTCCAGGCCTAGTAAA      |
| <i>Q. montana</i>   | locus_26885_29 | CCTGGCTATCATCTAAAACGGGTTGGAC[C/T]TCATTCCCTTTCTTGTCAGAAGCTTGGTCAAATTT<br>CTGTACACATATATTCTG     |
| <i>Q. montana</i>   | locus_27743_25 | TCTAAGGAATCGCAAGTACTTCCCT[T/A]GATTTTCCCTACACATGAAATACCAAATCATAAGTAA<br>ATTCCTGTTGAAGACTAATC    |
| <i>Q. montana</i>   | locus_28457_43 | AACATATATAATAGTATAATACAATCATTCTGCGTTATTTCT[T/A]TTTATTTGCCTGGCTATGCCT<br>AGAAAATAATCCAGGAGC     |
| <i>Q. montana</i>   | locus_30512_25 | TGCCCTTTCCTTATTCTCTCAGC[T/C]TTTTCTACTTCTTCTCTAGCTCTCTCCCACATGTGCCTTGC<br>ACGTGCGAACTCAGAC      |



|                                        |                |                                                                                                |
|----------------------------------------|----------------|------------------------------------------------------------------------------------------------|
| <i>Q. montana</i>                      | locus_30948_43 | TGTTGGGACATCCACGGGAGAAGAATAGGATGAAGAATATTA[G/A]TGGGAAGAGTTCAGGTAAT<br>TCACCTCAAAAGAGTCAGCAAGG  |
| <i>Q. montana</i>                      | locus_5482_34  | CATCAGCTTCTATTATCTATAACACCATTTCATTG[C/T]ATTGTCAGGATGGCCTGTGTTGCCATCTCC<br>AGATTCTTGCCGTTGAC    |
| <i>Q. montana</i>                      | newl_21880_27  | ACTGGACTGGCTGCACCATAAAATTTTC[G/A]TCATAATAGCATCGAGCCTTTCAAGGATTTTACAATT<br>GGTATTCAAACCTGTCCTCA |
| <i>Q. muehlenbergii/pri<br/>noides</i> | CL_18142_42    | AATTCTCTTTTCTCTGGTTGCTTTTTGCCCTTTTG[G/A]TTTCCTTTTCCTTTCCCCCTTAGATTCTGA<br>AGAAAAATCACTGTTTAGTT |
| <i>Q. muehlenbergii/pri<br/>noides</i> | CL_42027_49    | TACAAGATCACATATTCATTTCAAATGAATNATAAAGAACATN[T/C]TAAACTATTCAACAGTAGC<br>AGCTCTCATGATTCAAAGAAACC |
| <i>Q. muehlenbergii/pri<br/>noides</i> | CL_48165_56    | TTGCTTATATCATCAGGAATATGGCCAACAAGGTGGAGATTGTGCAAATC[C/T]AGAATGAGAAGC<br>AGCTCTATGCTTCCCAACTCCTT |
| <i>Q. muehlenbergii/pri<br/>noides</i> | locus_10104_41 | AAGGAGATGAACATTCATACTGCATCTTCAGTTGTTCTTG[T/C]AGTTGACTTTGCTCTAGTCTATA<br>TGACATGTCATGATTTTCCTG  |
| <i>Q. muehlenbergii/pri<br/>noides</i> | locus_12538_49 | ATTCAGGTTCTTTGCCTTCTCTATTG---<br>CATCATCTATCCCAGGGAA[G/C]GTTTTAGATCCATAGTCATCGTGCTTTGAGGGCCATA |
| <i>Q. muehlenbergii_pr<br/>inoides</i> | locus_29214_32 | TCAGGCCTTATGATGGTAATTATTGTATGAA[C/T]TGTCCACCGTTGTGTTTACCATTTTGTTATCTT<br>TTATAAATGAAACATTAGC   |
| <i>Q. muehlenbergii/pri<br/>noides</i> | newl_17339_35  | CGAGTNATAGCTTCGCTAATAGAACATATGGCNT[C/T]ATCTTGCCAGCAAACCTTTTNAGCAAGA<br>AATGTCCTAAGGGATTTAGGAT  |
| <i>Q.</i>                              | newl_20204_33  | CTGTTCTGTAAATGTTATGTGGTTGACTTGAA[A/G]GATGAAAATTCTGTAAATGCATGTATNATA                            |

|                                     |                |                                                                                                   |
|-------------------------------------|----------------|---------------------------------------------------------------------------------------------------|
| <i>muehlenbergii/pri<br/>noides</i> |                | CAGGATTAATAATATGCCTT                                                                              |
| <i>Q. oglethorpensis</i>            | locus_16087_43 | CCTTGGTACGTTTTTAAAAATTAATTATCCAGTGGACCTAA[A/G]CGAGCTTAGTCTGTCTGCCAA<br>TCATGGCATCA-TAGACACTA      |
| <i>Q. oglethorpensis</i>            | locus_32208_54 | TCCCTTCAGTGCAATTTTGATTCAATAACTGCAACAAATTAGTAATCTTA-<br>TA[A/G]TAATTGGCTAGAATGCATGTCAATCAGTGGGT    |
| <i>Q. oglethorpensis</i>            | locus_4100_37  | AAATTTATTAGCTTCTGCAATCACGAAACGACTGAT[G/T]CCCAAGTAAAAGCTCAGGTTGGAAAG<br>AGATGAGAAGTAGGAATTGG       |
| <i>Q. oglethorpensis</i>            | locus_4492_52  | AACAAAAGTT---<br>GAAGACGGGTAGAGTGCAGCACAATAAATTTCTTGCTT[A/G]TCTTTATCAAGTAATGACAGTGGA<br>ATTACAAGT |
| <i>Q. sinuata</i>                   | locus_10802_36 | AATCTTCTTACTGACATTGACATATCTGTTATCA[G/A]TTTCATCAGACTTGNCTCCAACTTCTCC<br>TGTAAGTGGTTTTTACCAT        |
| <i>Q. sinuata</i>                   | locus_20667_37 | TCGGAACAATAGGCAAAGTGGGCAAGAATTTGGCAA[C/T]AAAAGAGAGAACCTCAGGTATTGGC<br>CATTGGGTCTCACAATATCAGA      |
| <i>Q. sinuata</i>                   | locus_23517_52 | AACCAGCGGGTCGAATTTCCAATAAAGTCCAAGTGTAAAGGCTTATCTGCC[C/G]TGGTCAGACCT<br>AGACTGACCCATATTTT-TGT      |
| <i>Q. sinuata</i>                   | locus_27412_25 | ACGAAGTTTGCAAGGCGTGGCTAC[T/A]AGGGAAGCTCCCAAGGGCCATGATGATTTGTTTACACC<br>AAACCAAGAACATGAAGAGG       |
| <i>Q. sinuata</i>                   | locus_5229_56  | TGAGCCACTTAAAAATGGGGACCAATGAGGGAGTGAGGAAAAATAGAGCACTGCT[G/A]GTTTGG<br>ATTCGATTCTAAGGGCTAAGGC      |
| <i>Q. sinuata</i>                   | locus_792_52   | AACCAGGTAACATTAACAAATTAAGGTTCTGTTGCTGCAATGTAAATATGT[A/C]ATTTTGAATGT<br>ACAGGTAGTGAAACAGTGCC       |
| <i>Q. sinuata</i>                   | locus_8717_53  | TAATAGCTCAATATTGTGGACAAGCAGCGTACCTCAGGAAATCCCAGAGAA[T/C]GTGTCTAATA<br>CGTTCTACGACTCCATACCAGG      |
| <i>Q. sinuata</i>                   | locus_9837_55  | TGTTGCATCCCAAATGTCCAAGTACTANATGCCCATGCTTATCTATGAGAAGA[C/A]CTGAGCTAT                               |

---

C-AAACTCAGGCCTCTTCTCA

---

|                    |                |                                                                                                 |
|--------------------|----------------|-------------------------------------------------------------------------------------------------|
| <i>Q. stellata</i> | CL_11069_58    | CAAGTCACATTGCTAAAGTTGAGGATGATTTCCATGAAATGCAAGANCTGAN[A/G]GTTTCGTGCAG<br>AAGCTGCTGACGTTGCAAAATCT |
| <i>Q. stellata</i> | CL_12923_48    | GAGAGCAGAATCTGGTTCAATGGGTAAGAGACTGCCACCTTA[A/G]TTTCATATTTTCATGTACTGA<br>TGTTGATAGGGGTTCCCGGCCTT |
| <i>Q. stellata</i> | CL_24297_67    | ATGAGGTACCCGATTATAACCACGACNACAATTCAAGGGACCAAGGTGAAGATATTTGATTA[T/C]G<br>ATGAAGAGGTGGAGATAGTGTTT |
| <i>Q. stellata</i> | CL_2457_66     | CAATATCCTCTGCACGCTTCCTCGCCNCTTCAGCTTTTTCTGGCTGACTCATCAGCATCCT[A/G]CATT<br>AAAGTACATATGTATTAAGAA |
| <i>Q. stellata</i> | CL_2457_32     | CAATATCCTCTGCACGCTTCCTCGCC[A/G]CTTCGGCTTTTTCTGGCTGACTCATCAGCATCCTNCATT<br>AAAGTACATATGTATTAAGAA |
| <i>Q. stellata</i> | CL_45_63       | CAACTGATACGTGGTCAGATTGGCATAATACNTCTGTGCCACCGTCAAGTACGTATC[C/G]CCTGA<br>ATGAACCGTGACTCAAACATGT   |
| <i>Q. stellata</i> | CL_49075_43    | GCTGAGTTGCTTCTAAACTTCCTCCAGCTCACCTAG[G/A]AACATAACCTCCTTAGAACTATTCGT<br>AATTGGCCAATATTTTAGTAA    |
| <i>Q. stellata</i> | CL_55087_32    | CGACCAAGCTACAATGCTTCAGGGTA[T/G]TCTCTCTCCTGCTATACTAATGTTGCACTTCCTGTCC<br>TTGCAATTCGTGTTAAATGTTT  |
| <i>Q. stellata</i> | CL_6426_61     | TAGCTTCACATAGCAAGAGTCTGCTCGTTTGCTCAGCTGAACCAACGACCTGATC[A/G]AGGTTTC<br>AATATAACAAGGTTAATTCAGAA  |
| <i>Q. stellata</i> | locus_14289_31 | ATTTGTCCTCGTGGGTAAAGCTTCGGAACA[C/T]GCTCACTATAGAAAAATCTTTACCTTATTTGGG<br>ACCCCATCTTCCATGTACG     |
| <i>Q. stellata</i> | locus_17368_30 | GATTGATGGTTTCATGTGACCCAAAGTAA[A/C]AAACTGCCCTTAGCCCCACCATATGATGTGGGT<br>CATCAACTTGTGAACTTGTGT    |
| <i>Q. stellata</i> | locus_8104_38  | TTTTGGGGGTCAAAGAGTTCATAGTCCTACTCCAC--<br>[T/C]ATGCAGTGTAGACTGTAGGGTGGGGTGAAGGGGTTGGAAATATGCACAT |

---

---

|                              |                |                                                                                                 |
|------------------------------|----------------|-------------------------------------------------------------------------------------------------|
| <b><i>Q. stellata</i></b>    | newl_15918_41  | GTTGATACTTATCTGAGTGCAAGAGGGNCCCAACCATGAN[C/T]TTGTTGTTTCTGGCATCAAATTT<br>GTCTATGTAATCATTGATTTTT  |
| <b>East Asian white oaks</b> | newl_15225_27  | ATCAAGGAGGGCTGCTTTCTTTGTGT[A/G]GGACGGCCTGTTGGGGAGAGATCTTGAMCAATGAAA<br>ATCTTCAAAAAAAGAGGTATC    |
| <b>East Asian white oaks</b> | newl_16979_31  | CTACAGTAGAGGCTATTTTAGTGCCAAGCA[A/G]ATAGACCTTATTAAGTCTCACTAATGGAAGC<br>AACACCCCTCGACCCTAGATC     |
| <b>East Asian white oaks</b> | newl_23554_43  | ATCAACGCCATCATTCTTTCTGCKRGTAGRGTATTACCATG[C/T]TTTTTGTGCCACACAAGGATC<br>CGCTTTCTTGCAATATCACA     |
| <b>East Asian white oaks</b> | newl_27648_32  | ACAACCCATTCATCCTGCAATAAAACGTACA[A/G]TTAAYATCATTCAATTTACYRTCTGTCTTCAA<br>TTAATTAGTTAAGAGGTAT     |
| <b>European white oaks</b>   | newl_28982_61  | TGAGCCTGCTGTGATAGAGATNNNTNCCCCCCCAGAAGCTGTTATTGTGCCAGTTGCACT[G/A]CTT<br>GGGGTTTTAGATCACCCAATATA |
| <b>Clade 1</b>               | CL_31994_43    | CATCAGCATTTTGGTATCATGGATCAACTCACTCCCA[T/C]GACTTAACCCAATTAGGTAGTGCTGC<br>TGAAGTCCAAAGCCGTGAAACC  |
| <b>Clade 1</b>               | locus_25236_45 | TTTCTGTTTATCTACTTGTCATCTCTTTTATTCTTATTATTTAT[G/T]ATTTAATCTTATAAACACTAT<br>CCTAAACAAGAGATGATTC   |

---
